# Supplementary material for: Epidemiologic analysis and genetic diversity of Devriesea agamarum strains isolated from captive lizard collections
Source: Research Square preprint supplement (doi:10.21203/rs.3.rs-7865621/v1), 2025-11-20
Supplement: Supplementary file 1 [file a23ea20828fc51c8eab2e5ce.docx]

Supplementary Table S1. Reptile hosts and specimens analysed in the present study.

| No | Species | Sampling location | Positive/negative (growth intensity) | Isolate No |
| --- | --- | --- | --- | --- |
| 1 | Spiny-tailed lizard | Oral cavity | (-) |  |
| 2 | Spiny-tailed lizard | Oral cavity | (+) | D1 |
| 3 | Spiny-tailed lizard | Skin lesions | (+++) | D2 |
| 4 | African fat-tailed gecko | Oral cavity | (-) |  |
| 5 | Spiny-tailed lizard | Skin lesions | (-) |  |
| 6 | Spiny-tailed lizard | Skin lesions | (+++) | D3 |
| 7 | Spiny-tailed lizard | ND* | (-) |  |
| 8 | Spiny-tailed lizard | Skin lesions | (-) |  |
| 9 | Spiny-tailed lizard | Skin lesions | (-) |  |
| 10 | Spiny-tailed lizard | Skin lesions | (-) |  |
| 11 | Spiny-tailed lizard | Skin lesions | (-) |  |
| 12 | Spiny-tailed lizard | Skin lesions | (-) |  |
| 13 | Spiny-tailed lizard | Skin lesions | (-) |  |
| 14 | Spiny-tailed lizard | Skin lesions | (++) | D4 |
| 15 | Spiny-tailed lizard | Skin lesions | (-) |  |
| 16 | Spiny-tailed lizard | Skin lesions | (-) |  |
| 17 | Spiny-tailed lizard | Skin lesions | (-) |  |
| 18 | Spiny-tailed lizard | Skin lesions | (-) |  |
| 19 | Spiny-tailed lizard | Skin lesions | (-) |  |
| 20 | Spiny-tailed lizard | Skin lesions | (-) |  |
| 21 | Spiny-tailed lizard | Skin lesions | (+) | D5 |
| 22 | Spiny-tailed lizard | ND* | (-) |  |
| 23 | Bearded dragon | Oral cavity | (-) |  |
| 24 | Bearded dragon | Oral cavity | (+++) | D6 |
| 25 | Common collared lizard | Oral cavity | (-) |  |
| 26 | Bearded dragon | Oral cavity | (-) |  |
| 27 | Spiny-tailed lizard | Skin lesions | (-) |  |
| 28 | Spiny-tailed lizard | Skin lesions | (-) |  |
| 29 | Spiny-tailed lizard | Skin lesions | (-) |  |
| 30 | Spiny-tailed lizard | Skin lesions | (-) |  |
| 31 | Spiny-tailed lizard | Skin lesions | (-) |  |
| 32 | Spiny-tailed lizard | Skin lesions | (-) |  |
| 33 | Spiny-tailed lizard | Skin lesions | (-) |  |
| 34 | Spiny-tailed lizard | ND* | (++) | D7 |
| 35 | Spiny-tailed lizard | ND* | (+++) | D8 |
| 36 | Spiny-tailed lizard | Oral cavity | (-) |  |
| 37 | Panther chameleon | Skin lesions | (+) | D9 |
| 38 | Bearded dragon | ND* | (-) |  |
| 39 | Bearded dragon | Oral cavity | (-) |  |
| 40 | Spiny-tailed lizard | Skin lesions | (++) | D10 |
| 41 | Bearded dragon | Oral cavity | (-) |  |
| 42 | Leopard gecko | Oral cavity | (-) |  |
| 43 | Bearded dragon | Oral cavity | (-) |  |
| 44 | Veiled chameleon | Oral cavity | (-) |  |
| 45 | Bearded dragon | Oral cavity | (-) |  |
| 46 | Bearded dragon | Oral cavity | (-) |  |
| 47 | Spiny-tailed lizard | Oral cavity | (-) |  |
| 48 | Spiny-tailed lizard | Oral cavity | (-) |  |
| 49 | Bearded dragon | Oral cavity (gingivitis) | (++) | D11 |
| 50 | Leopard gecko | Oral cavity | (-) |  |
| 51 | Leopard gecko | Oral cavity (gingivitis) | (++) | D12 |
| 52 | Leopard gecko | Oral cavity (gingivitis) | (+++) | D13 |
| 53 | Leopard gecko | Oral cavity (gingivitis) | (++) | D14 |
| 54 | Bearded dragon | Oral cavity | (+++) | D15 |
| 55 | Leopard gecko | Oral cavity | (-) |  |
| 56 | Leopard gecko | Oral cavity (gingivitis) | (+++) | D16 |
| 57 | Bearded dragon | Oral cavity | (+) | D17 |
| 58 | Bearded dragon | Oral cavity | (-) |  |
| 59 | Bearded dragon | Oral cavity | (+++) | D18 |
| 60 | Panther chameleon | Oral cavity | (-) |  |
| 61 | Bearded dragon | Oral cavity | (-) |  |
| 62 | Bearded dragon | Oral cavity | (++) | D19 |
| 63 | *Pogona* sp | Oral cavity | (-) |  |
| 64 | Leopard gecko | Oral cavity | (-) |  |
| 65 | Bearded dragon | Oral cavity | (+) | D20 |
| 66 | Leopard gecko | Oral cavity | (-) |  |
| 67 | Leopard gecko | Oral cavity | (-) |  |
| 68 | Bearded dragon | Abscess | (+++) | D21 |
| 69 | Bearded dragon | Oral cavity | (+++) | D22 |
| 70 | Unspecified *Gekkonidae* | Oral cavity | (-) |  |
| 71 | Spiny-tailed lizard | Skin lesions | (+++) | D23 |
| 72 | Spiny-tailed lizard | Skin lesions | (++) | D24 |
| 73 | Bearded dragon | Oral cavity | (++) | D25 |
| 74 | Bearded dragon | Oral cavity | (-) |  |
| 75 | Bearded dragon | Conjunctiva | (+++) | D26 |
| 76 | Pygmy bearded dragon | ND* | (-) |  |
| 77 | Red tegu | Oral cavity | (-) |  |
| 78 | Bearded dragon | Abscess | (++) | D27 |
| 79 | Veiled chameleon | Abscess | (++) | D28 |
| 80 | Unspecified *Chamaeleonidae* | Conjunctiva | (++) | D29 |

ND* - no data on swabbing location, the animal was asymptomatic
